# Supplementary material for: Research on On-line Data Transmission Technology in Marine Controlled Source Electromagnetic Transmitter
Source: Copernicus journal article supplement (doi:10.5194/gi-2023-6), 2023-06-09
Supplement: Supplementary file [file gi-2023-6-RC1-supplement.pdf]

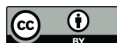

# 1 Research on On-line Data Transmission 2 Technology in Marine Controlled Source 3 Electromagnetic Transmitter

4 Chentao Wang<sup>1</sup>, Ming Deng<sup>1</sup>, Nini Duan<sup>1</sup>, Xiaoxi Ma<sup>1</sup>, Meng Wang<sup>1</sup>

5 <sup>1</sup> China University of Geosciences (Beijing), School of Geophysics and Information Technology, Beijing CO 100083, China

6 Corresponding author: Meng Wang (e-mail: wangmeng@cugb.edu.cn).

7 This work was supported by National Natural Science Foundation of China (41874142), the MOST Special Fund from the State  
8 Key Laboratory of Geological Processes and Mineral Resources, China University of Geosciences and the National Key R&D  
9 Program of China (2016YFC0303100).

10 **Abstract** This paper proposes a method for acquiring complete information and data from the  
11 Marine Controlled Source Electromagnetic (MCSEM) transmitter during offshore experiments. The  
12 lower position machine system is based on the STM32 platform and embedded with a real-time  
13 operating system. It utilizes the Internet of Things concept to interconnect various modules within  
14 the transmitter, enabling intelligent control and management. At the same time, data is uploaded to  
15 the control room on the deck through photoelectric composite cables and the upper computer's  
16 software designed by Python language will process and store all the data. This allows workers on  
17 the deck to control the lower computer and get high-precision complete data in real-time. The joint  
18 tests between the lower and upper computers have demonstrated the stability and reliability of the  
19 online transmitter system, which provides significant convenience for offshore exploration.

20 **Keywords :** MCSEM; Embedded system; Internet of Things; Online data transmission and  
21 processing

## 22 23 1 Introduction

24 The Marine Controlled Source Electromagnetic method plays a crucial role in exploring deep-  
25 sea oil and gas resources (Li et al., 2022; Constable, 2006, 2010). During marine exploration, the  
26 research vessel tows the electromagnetic transmitter close to the seafloor using the photoelectric  
27 composite deep-tow cable. The electromagnetic receiver then acquires the induction field source  
28 signal generated by the underground geological anomaly (Wang et al., 2013). After the instruments  
29 are recovered, the data collected from the receivers and transmitters are integrated, processed, and  
30 inverted to obtain the apparent resistivity of the seabed in the detected sea area (Connell et al., 2013).  
31 This effectively identifies hydrocarbons and provides the basis for the exploitation of oil and gas  
32 resource (Li et al., 2010; Wang et al., 2019; Constable et al., 2016).

33 ~~The development of MCSEM research in China began in 2006, supported by the National~~  
34 High-tech Research and Development Program (863 program) and other national funds. A series of  
35 MCSEM instruments have been developed, including mixed field source electromagnetic receiver,  
36 towed receiver (Chen et al., 2013), towed transmitter system (Wang et al., 2017), and deployed  
37 transmitter (Wang et al., 2017).

38 Nonetheless, these methods depend on locally deployed data, with merely a small fraction  
39 being uploaded to the deck for monitoring purposes. The comprehensive dataset for analysis

The research and development of MCSEM in China began in 2006,



40 typically becomes accessible only once the instrument is retrieved (Duan et al., 2018; Wang et al.,  
41 2022; Chen et al., 2020). This data acquisition method does not ensure the safety and promptness  
42 of the data. To minimize the risk of data loss and achieve real-time data transmission from the  
43 transmitter to the deck side, an online ~~current data transmission system~~ has been developed. Figure  
44 1 depicts the relationship between the online transmission system and the entire system.

recommend:  
substitute "current"  
with "real-time "

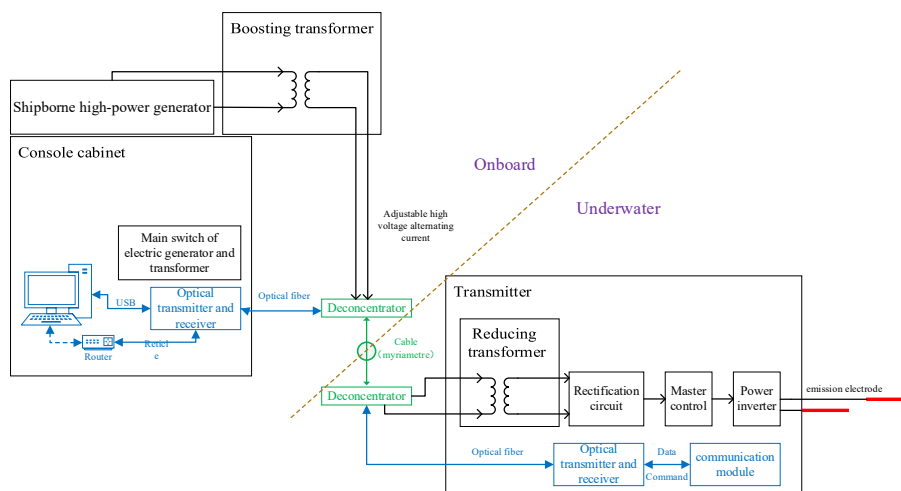

45  
46 Fig. 1 Working mode of the on-line transmission system in the whole system

47 The main task of the lower computer part in the system is to store the data into the storage  
48 media as a file according to the certain format, and provide inter-module communication channel,  
49 once the data from different modules is consolidated, it is transmitted via Ethernet for uploading.

50 The upper computer is responsible for receiving data from the lower computer, storing it on  
51 the upper computer, and providing users with a user-friendly interface to control the lower computer.

## 52 2 The technical scheme design of lower computer

### 53 2.1 Overall framework

54 The main control unit in the lower computer is the STM32F407ZGT6 produced by  
55 STMicroelectronics. We deploy data acquisition module, data storage module, serial  
56 communication module, Ethernet communication module, and real-time operating system. In the  
57 system, data management is facilitated by the FATFS system, and we have reserved "USMART"  
58 serial port function identification, "NETCONN" Ethernet interface. The coordination of each  
59 module is illustrated in Figure 2.

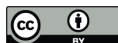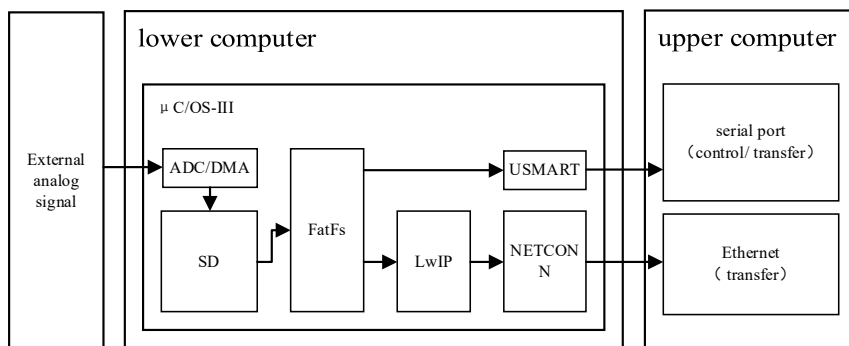

60  
61

Fig. 2 The overall framework of the lower computer program

### 2.1.1 Task management based on $\mu\text{C}/\text{OS-III}$

62 We utilize  $\mu\text{C}/\text{OS-III}$  as the system to manage complex tasks the lower computer. It is a  
63 preemptive multi-task real-time operating system based on priority which can significantly  
64 optimizes the program structure, increases readability, and improves portability. Each functional  
65 module is regard as a subtask for the operating system to schedule. These modules are independent  
66 of each other and provide corresponding APIs, making it convenient to transplant and greatly  
67 optimizes the Ethernet data transmission and command interaction.

### 2.1.2 File management based on FatFs

68 FatFs is a general file management module that is independent of the I/O layer of the disk,  
69 making it hardware architecture agnostic. This allows it to implement the related functions of a Fat  
70 file system in small embedded systems. In the system, file management of the lower computer is  
71 based on FatFs, which stores collected data to the SD card or other media in the form of a file and  
72 provides corresponding read-write functions for file transmission, this allows the main control chip  
73 to focus more on data transmission once the data is integrated into a file.

### 2.1.3 Internet of Things based on LwIP

74 There are a large number of data exchange behaviors within the lower computer, and how they  
75 work together depends on smooth data transmission channels. Leveraging the concept of the Internet  
76 of Things (IoT), we connect various modules through WiFi and Ethernet channels to ensure  
77 seamless communication, as the Figure 3. Meanwhile, using the serial port for file transmission is  
78 often limited due to the baud rate. To improve the speed of transmission and enhance the user  
79 experience of the software, Ethernet file transmission is used as the primary transmission mode in  
80 this design. Reliable Ethernet data transmission cannot be achieved without the TCP/IP protocol.  
81 However, traditional TCP/IP protocols are rarely used in small embedded systems. LwIP has the  
82 basic functions of TCP/IP and takes up less RAM, making it suitable for embedded systems with  
83 limited program space. LwIP also supports the DHCP protocol, can dynamically assign IP addresses,  
84 and provides a special internal callback interface that effectively improves program performance.

recommend:  
use "data exchange  
operations"  
appropriate

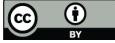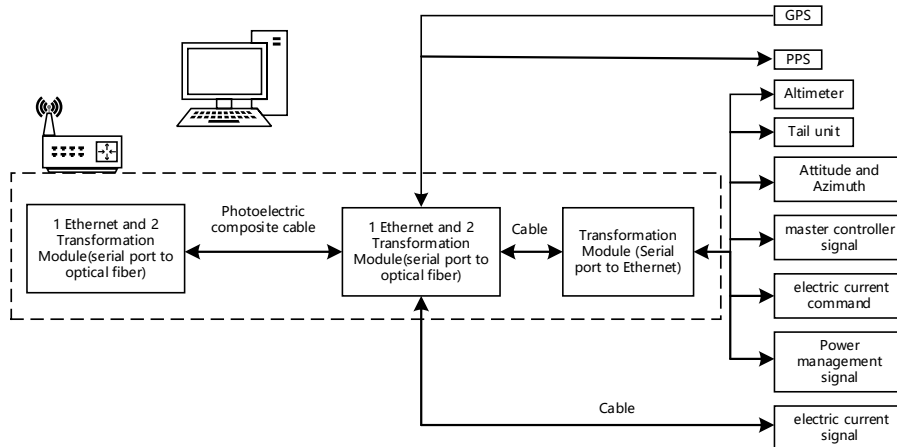

88

89

Fig. 3 Leveraging the concept of the Internet of Things (IoT)

90

91

92

#### 2.1.4 User operation based on USMART

93

The USMART module is used as a bridge between the user and the program in this design.

94

Users can use each function of the program through serial port commands, achieving the effect of

95

an external interrupt, which is of great significance for systems requiring remote real-time control.

96

Therefore, the USMART module is transplanted into the lower computer module to connect with

97

the upper computer software and provide users with various control commands and parameters.

98

This allows users to control the lower computer through the upper computer.

99

#### 2.2 Design of data acquisition module

100

##### 2.2.1 Configuration of ADC and DMA

101

The main control unit is equipped with a 12-bit successive approach analog-to-digital converter

102

(ADC) capable of measuring the signal of 16 external sources, 2 internal sources, and Direct

103

Memory Access (DMA) capabilities. DMA allows for quick transfer of data between peripheral

104

devices and memory, saving MCU resources for other operations. In this design, file storage and

105

data acquisition are carried out simultaneously, and the double buffer mode of DMA is used to solve

106

this problem. This mode significantly reduces the MCU load, as shown in Figure 4, which lists the

107

workflow of data acquisition and storage in three cases: without DMA, using DMA, and using DMA

108

double buffer mode. The execution efficiency of DMA double buffer mode is higher than the other

109

two modes.

add "has" between  
"and" and "Direct  
Memory  
Access(DMA)"

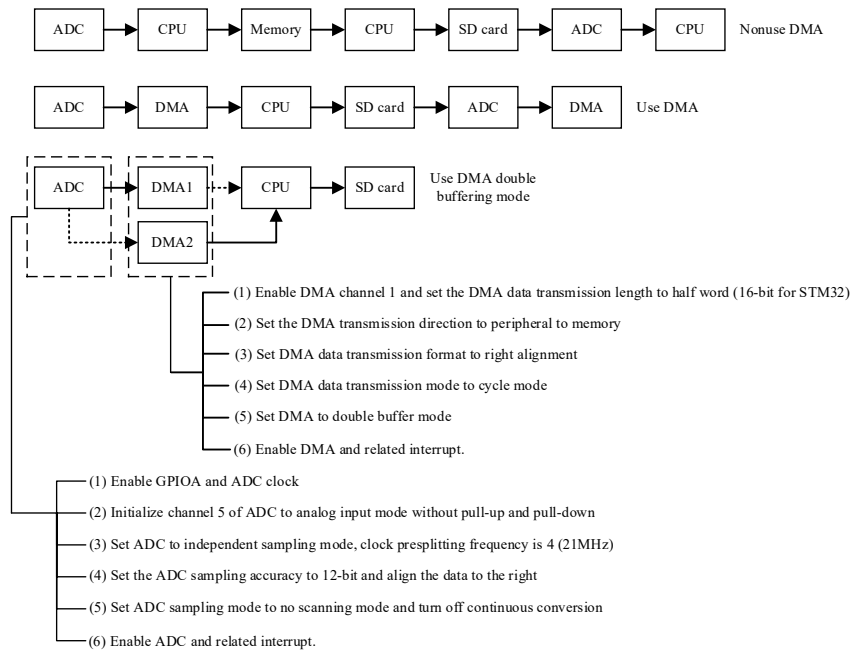

110

111

Fig. 4 Workflow of ADC / DMA in different modes and the configuration of DMA and ADC

112

### 2.2.2 Sampling rate configuration and data acquisition process monitoring

113

To ensure suitable sampling, the sampling rate should be adjusted according to the actual situation. In this design, the sampling rate of the ADC is controlled by the TIM3 timer. The trigger mode of the ADC is set to the TIM3\_TRGO event, and the working state of the ADC is controlled by the overflow interrupt of the TIM3 timer. The overflow time of TIM3 can be changed by external input parameters, such as the frequency division number and reset value. The ADC sampling rate calculation formula is as follows, where ARR represents the reset value and PSC represents the frequency division number:

120

$$ADCCLK=84000000/(ARR*PSC)$$

121

Additionally, an additional timer (TIM4) is used to capture the number of times that the ADC conversion is completed in a certain period. This allows for real-time estimation of the ADC sampling rate and monitoring of the ADC's running state.

122

123

### 2.3 Design of file storage module

124

In the file storage module, the data files are stored on an SD card, and the management of files relies on the FatFs file system. The porting process of the file system is not important, and the focus is on the method of realizing file storage. The storage process of the data file is illustrated in Figure 5. The write-flag and the stop-write flag are given by the serial port command, allowing users to start and terminate storage at any time. At the same time, the write-status flag is used to mark the current state of the file storage module. Setting the maximum number of writes can control the size of each data file to about 10MB. When the maximum number of writes is reached, the module will automatically close the current file and create a new file to continue writing. This ensures that when the system works for a long time, there are no problems caused by the size of a single data file.

132

133

134

replace "represent" with "stands for", avoiding word redundancy

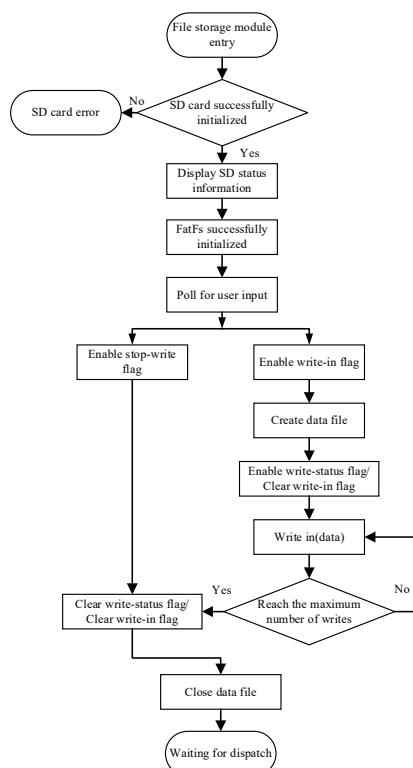

Fig. 5 Data file storage process

135  
136  
137  
138  
139  
140  
141  
142  
143  
144  
145  
146  
147  
148  
149  
150  
151  
152

## 2.4 Design of file transmission module

The file transfer module consists of Ethernet data transmission and serial data transmission functions. Ethernet data transmission is based on LwIP, and serial transmission is used as a backup channel for Ethernet transmission. The default baud rate for serial port transmission is 115,200 bps, and the default port number for Ethernet transmission is 8,087. The lower computer acts as the client, while the upper computer is the server.

### 2.4.1 Data file transmission of Ethernet

The LwIP protocol stack cannot be directly transplanted to the  $\mu$ C/OS-III system and requires encapsulation. LwIP has three commonly used programming interfaces: RAW, NETCONN, and socket interfaces. The RAW programming interface is often used when LwIP is used alone, while the NETCONN and socket interfaces are suitable to use with an operating system. The NETCONN interface is a structure abstracted from LwIP and is more concise than the socket interface. It does not waste memory when copying files. Therefore, the NETCONN programming interface is used in this design.

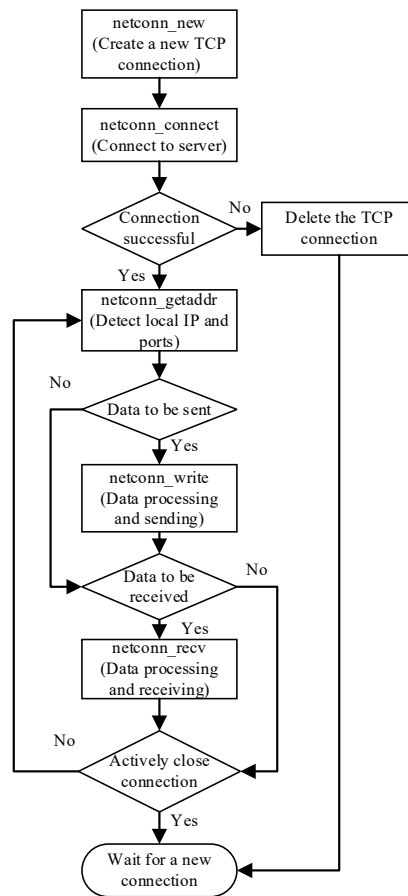

153

154

Fig. 6 Ethernet data file transmission process

155

156

157

158

159

160

161

162

163

164

165

The flow chart of Ethernet data file transmission with the NETCONN programming interface is shown in Figure 6. In the process of data file reading, the length of single data should not be too small to reduce the impact of instruction judgment on transmission speed. In limited program space, the dynamic memory allocation method is necessary. The program uses the malloc function to dynamically allocate a data buffer of 512\*32 bytes in SRAMIN (extended internal SRAM), which is automatically released after use. The size of the cache is a multiple of 512 bytes because the read and write object of the FatFs file system is a sector (512 bytes). After setting the length of a single data, it is necessary to increase the Ethernet data sending window. If the default sending window is used, packet loss will occur when the window length is less than the data length, which will affect the accuracy of the data.

165

#### 2.4.2 Data file transmission and status control of serial port

166

167

168

169

As a key debugging tool and data communication interface, the importance of serial port is self-evident. In this design, CH340G is used as the serial port to USB chip because the MCU needs to communicate with the host computer through the USB interface. The CH430G chip can be compatible with RS485, RS232, and other interfaces through the external level converter. As a full-

level translator is better

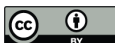

170 speed USB device interface, it is compatible with USB2.0 and serial port applications under the  
171 Windows operating system.

172 With the hardware environment in place, the configuration of the serial port in the program  
173 follows these steps: (1) Enable GPIOA clock and enable USART1 clock. (2) Reuse GPIOA9 and  
174 GPIOA10 for USART1. (3) Enable GPIOA9 and GPIOA10. (4) Set the baud rate of the serial port  
175 to 115200bps, the data-bit is 9, the stop-bit is 1, and the check mode is odd check. (5) Enable serial  
176 port transceiver mode. (6) Write the interrupt function of USART1 and enable the interrupt.

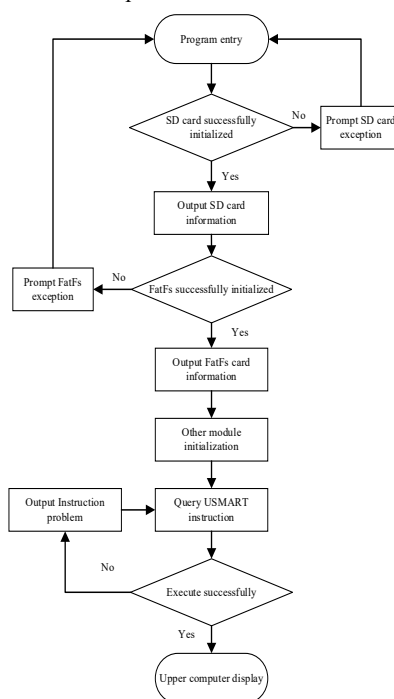

177  
178 Fig. 7 Flow chart of serial port status control

179 In the process of serial port configuration, special attention should be paid to the 9 data bits,  
180 where the eighth bit is the data and the ninth bit is the parity check bit. The parity check mode  
181 corresponds to the single-chip microcomputer. After completing the above configuration process  
182 and main program preparation, the MCU can realize analog signal acquisition, serial port  
183 transmission, file management, and other functions.

184 Figure 7 shows the flow chart of using the serial port to control the lower computer. After the  
185 initialization of the ADC/DMA, file system, SD card, and other modules, the MCU can realize the  
186 corresponding functions through the commands and parameters provided by USMART. However,  
187 if the command or parameter is incorrect, the program will automatically return the error reason and  
188 output it to the serial port to prompt the user to verify.

### 189 3 The technical scheme design of upper computer

190 The upper computer receiving software for the marine controlled source online transmitter  
191 system is designed using the Python programming language. Python is a cross-platform high-level  
192 programming language with good portability and perfect functional modules, which can meet the  
193 needs of online data transmission. Additionally, Python has unique advantages in machine learning

perform?





194 and data analysis. In the future, the Python platform can be used to analyze and learn the data in the  
195 file, providing real-time prediction and early warning for marine experiments during software  
196 iteration.

### 197 **3.1 Python programming environment construction**

198 The upper computer program is developed in PyCharm integrated development environment,  
199 and its configuration process is shown in the Table 1.

200 Table 1 PyCharm environment construction process

| PyCharm programming environment setup | Function                                             |
|---------------------------------------|------------------------------------------------------|
| Configure Anaconda                    | Provide interpreter, PyQt5 module and other tools    |
| Add Qt Designer tool                  | Provides graphical design tools                      |
| Add PyUIC                             | Convert the .ui file into the .py file               |
| Import serial module                  | Provide methods related to serial port               |
| Import os module                      | Provide methods for document management systems      |
| Import PyQt5 module                   | Provides the definition and usage of related widgets |
| Import time module                    | Provides methods for program delay                   |
| Import datetime module                | Provides methods for system time                     |
| Import thread module                  | Provides multithreading related methods              |
| Import socket module                  | Provides the underlying Ethernet-related approach    |

#### 201 **3.1.1 Configure Anaconda interpreter**

202 The most important thing to build PyCharm environment is the choice of interpreter. Anaconda  
203 is an open source package manager. It contains more than 100 packages and dependencies, such as  
204 Panda (a tool set for analyzing structured data), NumPy (a module that supports a large number of  
205 dimensional arrays and matrix operations, and also provides a large number of mathematical  
206 function libraries for Array Operations), PyQt (a toolkit for creating GUI applications), etc. This  
207 design uses Anaconda as the interpreter environment of PyCharm, and uses PyQt5 contained in  
208 Anaconda for UI design.

#### 209 **3.1.2 Import of function modules**

210 This design needs to transmit data files and control commands through serial port, so serial  
211 communication is the most basic function. As a Python module, serial integrates most of the  
212 commonly used serial port configuration methods, so it is necessary to import the serial module into  
213 the project. Use “import serial” statement to import serial module.

214 This design needs to extract the data files in the lower computer to the PC, so the OS file  
215 management module is essential. Through the method of the OS module, a series of operations such  
216 as adding, deleting, and rewriting can be realized. Use “import OS” statement to import the OS  
217 module.

218 PyQt5 is a Python module under Qt framework, which contains hundreds of classes and  
219 thousands of functions and methods. This design mainly uses two modules in PyQt5, one is Qt Core  
220 (including core non-GUI functions, such as process time, files and directories, various data types,  
221 streams, URL, MIME types, threads, and processes). The second is Qt Widgets (the module contains  
222 the classic desktop style user interface and provides a set of UI element classes). Use “PyQt5 import  
223 Qt Widgets”, “from PyQt5.QtCore import Qt timer” statements to import module respectively.

224 This design needs to make the RTC of MCU synchronize with PC, so it needs to obtain the  
225 system time of upper computer for MCU. The main function of datetime module is to enable the



226 program to obtain the current time of the system and output it in the specified data format. Import  
227 the datetime module ~~needs to use “import datetime” statement.~~ needs ?

228 Time module provides the function of program delay, which is mainly used to reserve sufficient  
229 time for serial transmission. Use “import time” to import the time module.

### 230 3.2 Use of multithreading

231 The smooth operation of the upper computer software depends on the repainting of UI interface.  
232 However, both serial file transfer and Ethernet file transfer will interrupt the redrawing process,  
233 leading to software death. In order to solve this problem, we need to use multithreading in the  
234 program.

235 Multithreading is not that multiple tasks run at the same time, CPU switches between different  
236 tasks quickly according to the needs, and achieve the effect which likes running at the same time.  
237 Under Windows platform, the independence of each task in multi process is better than that in  
238 multithreading, but its system occupancy is much higher than that in multithreading. Therefore, this  
239 program uses multithreading. As shown in Figure 8, the program is mainly divided into the  
240 following three threads: 1. The main thread, mainly responsible for command processing and UI  
241 interface redrawing. 2. Serial port transmission thread, mainly responsible for the construction of  
242 serial port channel, the receiving of serial command and data file. 3. Ethernet thread, mainly  
243 responsible for the construction of Ethernet channel and Ethernet file transmission.

244 Through “thread(target=thread name)” method to create the process. Through  
245 “threading.Event” method to set flag events for each thread to control the start or stop.

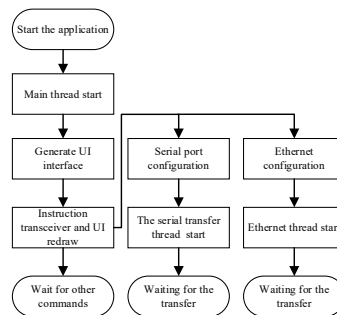

246  
247 Fig. 8 Thread workflow

#### 248 3.2.1 Construction of serial transmission thread

249 The serial module is needed to build the serial port channel for the upper computer software.  
250 The construction process is divided into the following steps: (1) Use “serial.Serial” method to create  
251 a serial port object. (2) Use “self.ser.port” method to set the serial port to be opened. Use  
252 “self.ser.baudrate” method to set the baud rate. Use “self.ser.bytesize” method to set the number of  
253 bits of data transmission and “self.ser.stopbits” method to set the stop-bit and “self.ser.parity”  
254 method to set the parity bit. (3) Use “try” statement to call the “self.ser.open” method. Open the  
255 serial port according to the above settings. If the serial port can be opened, it will display that the  
256 serial port has been opened, and enable to close the serial port button, and set the open serial port  
257 button to the unselected state. If it cannot be opened, port error is displayed.

#### 258 3.2.2 Ethernet thread construction

259 The upper computer software requires the socket module to build the server. The construction  
260 process is divided into the following steps: (1) Use the “socket.gethostname” method to obtain the

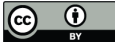

261 local IP address. (2) Use the "socket.socket(AF\_INET, SOCK\_STREAM)" method to create the  
262 Ethernet interface. (3) Use the "sk.bind" method to bind the local address. (4) Use the  
263 "sk.setsockopt(SOL\_SOCKET, SO\_RCVTIMEO, 1000)" method to set the timeout to 1000ms. (5)  
264 Use the "sk.accept" method to wait for the client to connect.

### 265 3.3 UI design based on Qt Designer

266 To design a UI interface in PyQt5, it can be achieved by writing code directly or by using the  
267 graphical design interface of Qt designer. Compared to directly achieving the UI through the code,  
268 the graphical interface can be more intuitive to see the relationship between the various controls,  
269 and the designer will have a better grasp of the overall interface. Qt designer is used to design the  
270 UI and can be added to PyCharm's external tools from the Anaconda package. The UI interface  
271 design results are shown in Figure 9.

272 The .ui file generated by Qt designer cannot be used directly. PyUIC is needed to make Qt  
273 designer and Python work together. PyUIC is an automated scripting tool that can convert .ui files  
274 into executable .py files for Python.

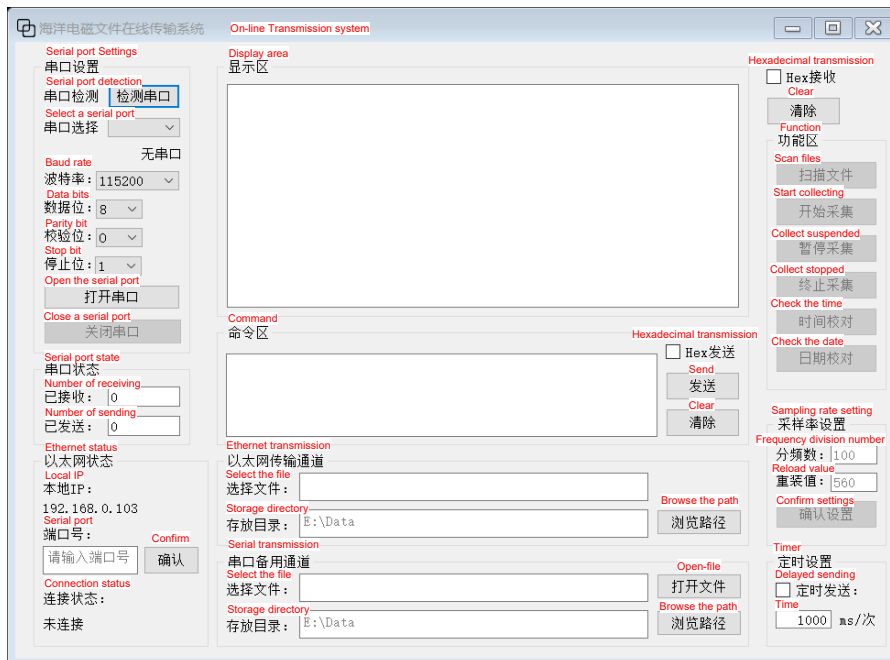

275  
276

Fig. 9 UI interface

### 277 3.4 Compilation of function

#### 278 3.4.1 Create class

279 After using Qt designer to complete the design of UI, the generated .ui file is saved in PyCharm  
280 project directory, and the .ui file is converted to .py file by using PyUIC. This file will contain a file  
281 called "UI\_Form" class, which contains the basic information of the designed UI. In their own  
282 projects, "UI\_Form" is imported as a module, and then a subclass "My\_Client" is created and make  
283 it inherit "UI\_Form" properties, and an instance of UI interface is built.

#### 284 3.4.2 Define methods and connect to widgets

.UI



285 In order to implement functions in a UI interface, each widget needs to be given corresponding  
 286 methods. The initialize function is defined, in which the connect method is used to connect the  
 287 function and the widget by using the syntax "self.widget\_name.signal.connect  
 288 (self.function\_name)".

289 For button widgets, such as "self.open\_button.clicked.connect(self.port\_open)", this means  
 290 that when the "open\_button" is pressed, the program will execute the "port\_open" function.

291 For text widgets, such as "self.s1\_box2.currentTextChanged.connect(self.port\_imf)", this  
 292 means that when the value of "s1\_box2" is changed, the program will execute the "port\_imf"  
 293 function.

294 For check box widgets, such as "self.timer\_send\_cb. stateChanged.connect(self.  
 295 data\_send\_timer)", this means that when the checkbox is selected, the program executes the  
 296 "data\_send\_timer" function.

297 According to the above method, each widget is given a corresponding function.

### 298 3.4.3 Write the function corresponding to each widget

299 Table 2 shows the names and functions of each widget in the program. The following is a brief  
 300 introduction to the realization process of several main functions.

301

Table 2 function names and functions

| Control items         | Function names  | Function performance       |
|-----------------------|-----------------|----------------------------|
| port check button     | port check      | Find out the serial port   |
| port open button      | port open       | Open the serial port       |
| port close button     | port close      | Close the serial port      |
| data send button      | data send       | Send data                  |
| data receive browser  | data receive    | Receive data               |
| send clear button     | send data clear | Clear the data in the area |
| file open button      | file open       | Open the file              |
| copy file button      | copy file       | Transfer files             |
| sampling rates button | sampling rates  | Set sampling rate          |
| time button           | set time        | Set time                   |
| write button          | write in        | Data recording             |
| finish button         | finish write    | Stop recording             |
| send timer button     | data send timer | Timed transmission         |

302 The "port\_close" function is used to close the current serial port. This function first stops the  
 303 timer and stops transferring the contents of the buffer. It then uses the "try" statement to call the  
 304 "self.ser.close" method to close the serial port. Finally, it clears all the buffer areas and display area  
 305 contents, resets all widgets to the default state, and changes the serial port status to "closed".

306 The "data\_send" function sends the content of the command area through the serial port. This  
 307 function first uses the "toPlainText" method to format the text of the command area to the local  
 308 variable "input\_s" when the serial port has been opened. It then checks whether the hexadecimal  
 309 sending status bar is selected, and if so, the "input\_s" will be converted into hexadecimal. After  
 310 processing the data, the function uses the "self.ser.write" method to write it to the serial port.

311 The "data\_receive" function displays the data sent by the lower computer to the host computer  
 312 in the receiving area through the serial port. This function first uses the "self.ser.inWaiting" method  
 313 to return the length of the data in the buffer and stores it in "num". It then uses the "self.ser.read"  
 314 method to read out the data. In this process, the value of "num" is recorded and accumulated to get  
 315 the total amount of data received. The "textcursor" method is used to obtain the position of the  
 316 cursor in the receiving area, and at the same time, the "movePosition.end" method is used to move  
 317 the cursor target to the bottom (to ensure that the cursor remains at the end of the data write).



318 The "send\_data\_clear" function uses the "setText" method to set the contents of the command  
319 area to an empty string.

320 The "receive\_data\_clear" function uses the "setText" method to set the contents of the display  
321 area to an empty string.

322 The "file\_open" function uses the "toPlainText" method to obtain the file name specified in the  
323 address bar, and the content of the command area is set to the function that the lower computer can  
324 recognize to open the file. The "ser.write" method is used to send the command.

325 The "copy\_file" function uses the "os.chdir" method to change the program running directory  
326 to the specified location, and the files specified in the lower computer are extracted to the upper  
327 computer. The "ser.inWaiting" method is used in the process of transmission to determine whether  
328 the transmission is completed, and a prompt is given in the command area after the transmission is  
329 completed.

330 The "sampling\_rates" function uses the "self.text" method to obtain the frequency division  
331 number and the reload value input by the user. The current sampling rate is calculated by the formula  
332  $8400000/(ARR \times PSC)$  and displayed in the command area. Finally, the command of changing the  
333 sampling rate is sent to the lower computer.

334 The properties in the 'init' function are automatically generated when the class is instantiated.  
335 The "super(My\_Client, self).init" method is used to call the function from its parent class to  
336 complete initialization. The "setUpUi" method from the parent class is called to make its UI interface  
337 layout according to the designed UI interface. The name of the form is set to "marine  
338 electromagnetic file online transmitter system" using the "setWindowTitle" method. The  
339 "serial.Serial" method is used to configure the API functions related to the serial port.

340 After the above process, we have created a class that meets the expected function. For Python,  
341 it is equivalent to completing a drawing. Next, we should instantiate it. Firstly, the  
342 "QtWidgets.QApplication(sys.argv)" method is used to create a form application with parameters  
343 ("sys.argv" is the bridge between the program and the external parameters and points the external  
344 action to the program). Then, the designed class "My\_Client" is used to create an instance named  
345 "my\_show", and the "show" method is used to visualize the program window. Finally, the  
346 "sys.exit(app.exec\_())" method is used to leave an exit for the program.

#### 347 **4 Joint tests**

348 Figure 10 shows the actual situation of the joint test of the lower computer and the upper  
349 computer.

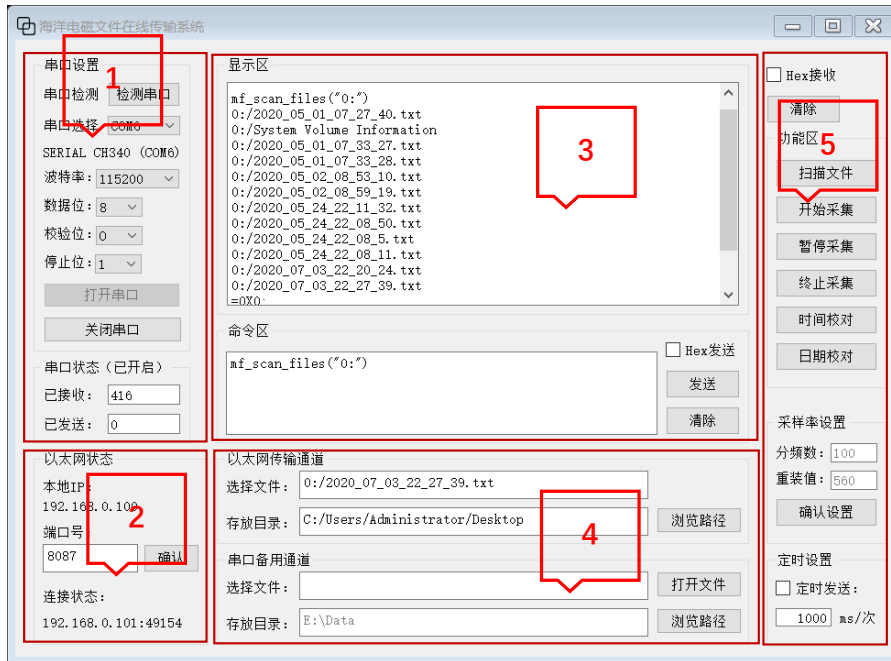

350  
 351  
 352  
 353  
 354  
 355  
 356  
 357

Fig. 10 Software running status

Area 1 is the serial port configuration area, where the baud rate is set to 115200bps, the data is set to 8-bit, the verification mode is set to ODD, and the stop-bit is set to 1. After the configuration is completed, the user can see that the serial port is successfully opened, and the port is set to COM6.

Area 2 is the Ethernet configuration area, where the local IP is automatically obtained by the software, and the port number is set to 8087. After clicking the confirm button, the user can see the remote IP and port in the connection status area.

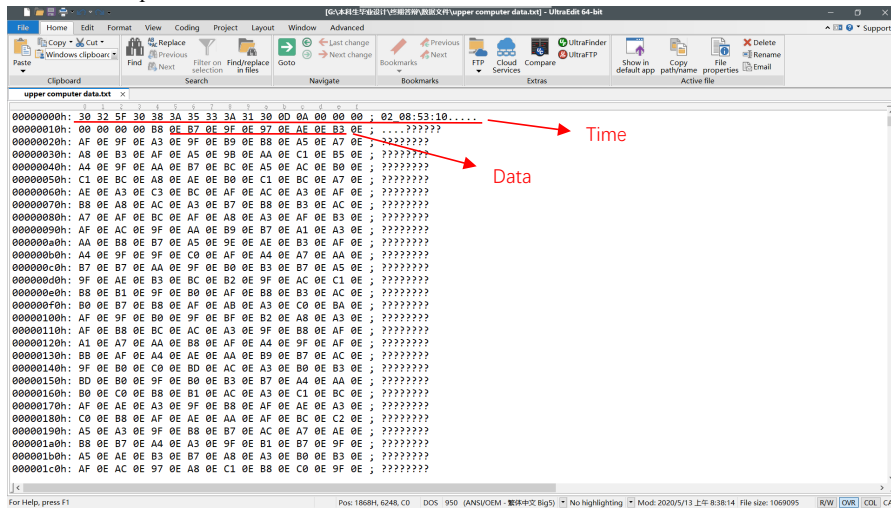

358  
 359

Fig. 11 Data file extracted to upper computer (Ultra Edit)



360 Area 3 is the command area and display area. In the figure, it shows the file query function,  
361 and the display area shows all files and folders under the root directory of the SD card.

362 In order to verify the accuracy of data transmission, it is necessary to compare the data files  
363 stored in the SD card with those extracted to the upper computer. As shown in Figure 11 and Figure  
364 12, we can see that the byte difference between the two files is zero, that is, the two files are equal.  
365 After many tests, the accuracy of the file on-line transmitter system in this paper is proved.

the same. ?

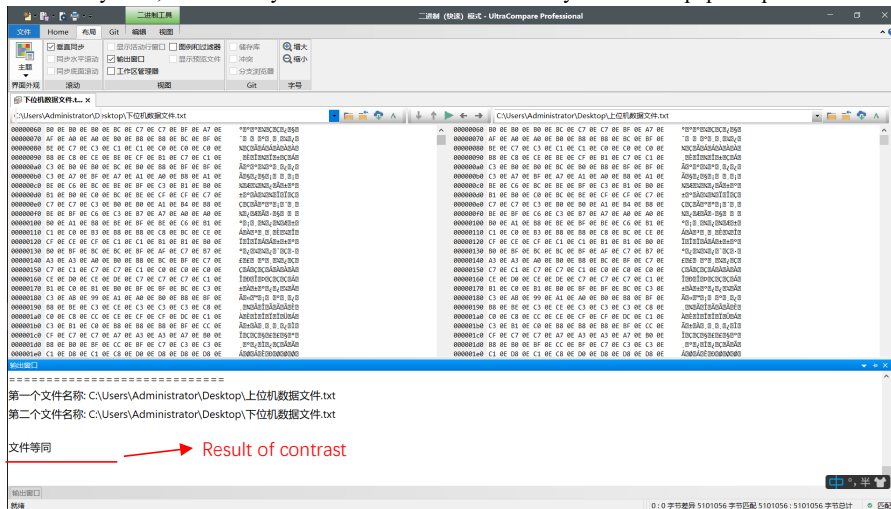

366  
367

Fig. 12 Comparison of data files (Ultra Compare)

368 In the transmission process of a standard data file with a size of 10 MB, we tested its  
369 transmission rate, including serial transmission rate and Ethernet transmission rate. The Ethernet  
370 transmission rate is much higher than the serial transmission rate. The average Ethernet transmission  
371 speed is 600 KB/s compared to the 10 KB/s of serial communication rate. The data file transmission  
372 can be completed in about 15 seconds, as shown in Figure 13.

373 Compared with traditional data transmission methods, on-line transmission has significant  
374 advantages in real-time data transmission. The data can be transmitted in real-time, allowing for  
375 immediate decision-making and action to be taken. This is especially important in marine operations,  
376 where timely information can prevent accidents.

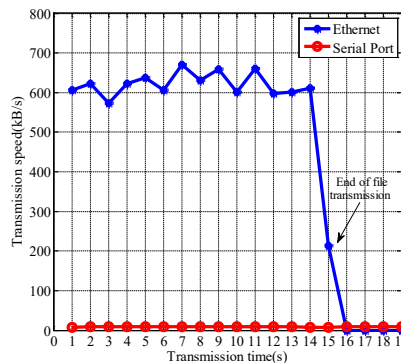

377  
378

Fig. 13 Transmission rate test of 10M data file



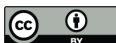

#### 379 **4 Conclusion**

380 The technical scheme of the marine controlled source electromagnetic current file on-line  
381 transmitter system uses STM32 as the lower computer to complete the functions of data acquisition,  
382 data storage, and file transmission. The upper computer software is designed using Python language,  
383 allowing users to control the single-chip microcomputer and acquire data files through the upper  
384 computer software.

385 In the lower computer module, the ADC is used to accurately collect the analog current signal,  
386 and the DMA double buffer mode is used in the acquisition process, which greatly improves the  
387 utilization of CPU. The FatFs file system is used to save the collected data to the SD card in the  
388 form of a file. After receiving the command from the upper computer, the data file can be transmitted  
389 to the upper computer through the serial port and Ethernet.

390 In the receiving software of the upper computer, Python language is used to realize the basic  
391 serial communication and Ethernet communication functions, and the UI design of the upper  
392 computer software is completed with the help of Qt designer. The software uses multithreading  
393 technology to solve the problem of program death in the process of file transmission.

394 In the joint test of the upper computer and the lower computer, the serial communication, file  
395 transmission, time correction, data acquisition, and other functions are tested. The final test result  
396 shows that the on-line transmitter system can run stably for a long time, and the upper computer can  
397 successfully control the lower computer. Data files can be obtained from the lower computer to the  
398 upper computer, and the Ethernet file transfer rate can reach 600 KB/s, which can meet the needs  
399 of marine operations. By using data comparison software, the difference between the data files in  
400 the SD card and the data files transferred to the upper computer is compared, and the results prove  
401 the accuracy of data transmission.

402 The on-line system for marine controlled source electromagnetic data not only provides great  
403 convenience for marine experiments but also provides security for the experimental data. In the  
404 future, software optimization can take advantage of Python language in machine learning and data  
405 analysis, so that it can provide a real-time visual interface, complete warning and prediction, and  
406 the on-line transmitter system will provide greater assistance for marine experiments.

#### 407 **5 Statement**

408 This manuscript satisfies the following statements that: 1) all authors agree with the submission, 2)  
409 the work has not been published elsewhere, either completely, in part, or in another form, and 3) the  
410 manuscript has not been submitted to another journal.

#### 411 **6 Reference**

- 412 [1] S. Y. Li, C. Y. Gu, J. Y. Yang, Y. Zhang, S. Diao, and Y. J. Ji, "A review of marine controlled-  
413 source electromagnetic data preprocessing technology," (in English), *Aip Adv.*, vol. 12, no. 9,  
414 Sep 1 2022, doi: 10.1063/5.0090082.
- 415 [2] S. Constable, "Marine electromagnetic methods—A new tool for offshore exploration," *The*  
416 *Leading Edge*, vol. 25, no. 4, pp. 438-444, 2006, doi: 10.1190/1.2193225.
- 417 [3] S. Constable, "Ten years of marine CSEM for hydrocarbon exploration," *GEOPHYSICS*, vol.  
418 75, no. 5, pp. 75A67-75A81, 2010, doi: 10.1190/1.3483451.
- 419 [4] M. WANG *et al.*, "Marine controlled source electromagnetic launch system for natural gas  
420 hydrate resource exploration," *Chinese Journal of Geophysics*, vol. 56, no. 11, pp. 3708-3717,  
421 2013.

implement ?

replace "and" with  
"or", data file  
transmission uses  
ONLY one of the two  
modes at one time ?





- 422 [5] D. Connell and K. Key, "A numerical comparison of time and frequency-domain marine  
423 electromagnetic methods for hydrocarbon exploration in shallow water," *Geophysical*  
424 *Prospecting*, vol. 61, no. 1, pp. 187-199, 2013.
- 425 [6] L. Yu-Guo and S. Constable, "Transient electromagnetic in shallow water: insights from 1D  
426 modeling," *Chinese Journal of Geophysics*, vol. 53, no. 3, pp. 737-742, 2010.
- 427 [7] S. Wang, S. Constable, V. Reyes-Ortega, and C. A. Rychert, "A newly distinguished marine  
428 magnetotelluric coast effect sensitive to the lithosphere–asthenosphere boundary," *Geophysical*  
429 *Journal International*, vol. 218, no. 2, pp. 978-987, 2019.
- 430 [8] S. Constable, P. K. Kannberg, and K. Weitemeyer, "Vulcan: A deep-towed CSEM receiver,"  
431 *Geochemistry, Geophysics, Geosystems*, vol. 17, no. 3, pp. 1042-1064, 2016.
- 432 [9] Chen K, Jing J E, and Wei W B, "Numerical simulation and electrical field recorder  
433 development of the marine electromagnetic method using a horizontal towed-dipole source,"  
434 *Chinese J. Geophys*, vol. 56, no. 11, pp. 3718-3727, 2013.
- 435 [10] M. Wang, M. Deng, Z. Wu, X. Luo, J. Jing, and K. Chen, "The deep-tow marine controlled-  
436 source electromagnetic transmitter system for gas hydrate exploration," *Journal of Applied*  
437 *Geophysics*, vol. 137, pp. 138-144, 2017.
- 438 [11] M. WANG, M. DENG, Z.-L. WU, X.-H. LUO, J.-E. JING, and K. CHEN, "New type deployed  
439 marine controlled source electromagnetic transmitter system and its experiment application,"  
440 *Chinese Journal of Geophysics*, vol. 60, no. 11, pp. 4253-4261, 2017.
- 441 [12] N. Duan, M. Wang, G. Wang, P. Yu, M. Deng, and X. Li, "Research on the isolation and  
442 collection method of multi-channel temperature and power supply voltage under strong marine  
443 controlled source EMI," *IEEE Access*, vol. 7, pp. 6400-6411, 2018.
- 444 [13] M. WANG, M. DENG, P. YU, C. YIN, K. CHEN, and X. LUO, "High-power time-frequency  
445 transmission and multi-chain cable multi-component electromagnetic system for deep-water  
446 exploration," *Chinese Journal of Geophysics*, vol. 65, no. 9, pp. 3664-3673, 2022.
- 447 [14] K. Chen, M. Deng, P. Yu, Q. Yang, X. Luo, and X. Yi, "A near-seafloor-towed CSEM receiver  
448 for deeper target prospecting," *Terrestrial, Atmospheric & Oceanic Sciences*, vol. 31, no. 5,  
449 2020.
- 450
